# Supplementary material for: Factors affecting the occurrence and activity of clouded leopards, common leopards and leopard cats in the Himalayas
Source: Springer Nature journal article supplement (doi:10.1007/s10531-019-01912-7), 2019-12-07
Supplement: MOESM1 [file 17481536]

Supplementary Material for the article Can *et al*. "FACTORS AFFECTING THE OCCURRENCE AND

ACTIVITY OF CLOUDED LEOPARDS, COMMON LEOPARDS AND LEOPARD CATS IN THE HIMALAYAS".

**Table S1. Correlation among predictor variables. With the exception of altitude, the metrics used were the proportion of days at a station when any images of the taxon/taxa were recorded. Critical values, P = 0.05: |r|= 0.22 (emboldened), P=0.01: |r|= 0.28, P=0.001: |r| = 0.36.**

|  | Altitude | Primates | Red muntjac | Ungulates | Wild boar | MSGLB | Porcupine | MSGLB, porcupine | Humans | Humans or stock | Common leopard | Clouded leopard | Leopard cat |
| --- | --- | --- | --- | --- | --- | --- | --- | --- | --- | --- | --- | --- | --- |
| Altitude | 1.00 | **-0.35** | **-0.33** | 0.17 | **-0.26** | -0.03 | **-0.42** | **-0.31** | **-0.46** | **-0.48** | -0.08 | -0.17 | **-0.43** |
| Primates |  | 1.00 | **0.58** | 0.03 | 0.25 | **0.31** | **0.28** | **0.41** | 0.07 | 0.10 | **0.37** | 0.02 | **0.28** |
| Ren Muntjac |  |  | 1.00 | **0.27** | **0.31** | **0.45** | **0.32** | **0.54** | **0.31** | **0.34** | **0.36** | 0.00 | **0.37** |
| Ungulates |  |  |  | 1.00 | -0.07 | 0.03 | -0.02 | 0.01 | **-0.22** | -0.20 | 0.07 | 0.00 | -0.09 |
| Wild boar |  |  |  |  | 1.00 | **0.33** | 0.05 | **0.27** | **0.30** | **0.29** | 0.11 | 0.03 | 0.18 |
| MSGLB |  |  |  |  |  | 1.00 | 0.03 | **0.72** | **0.33** | **0.30** | 0.08 | 0.01 | 0.21 |
| Porcupine |  |  |  |  |  |  | 1.00 | **0.71** | **0.29** | **0.31** | 0.02 | **0.38** | **0.32** |
| MSGLB, porcupine combined |  |  |  |  |  |  |  | 1.00 | **0.43** | **0.43** | 0.07 | **0.27** | **0.37** |
| Humans |  |  |  |  |  |  |  |  | 1.00 | **0.98** | 0.23 | -0.02 | **0.58** |
| Humans or domestic stock |  |  |  |  |  |  |  |  |  | 1.00 | 0.22 | -0.05 | **0.57** |
| Common leopard |  |  |  |  |  |  |  |  |  |  | 1.00 | -0.02 | **0.38** |
| Clouded leopard |  |  |  |  |  |  |  |  |  |  |  | 1.00 | 0.11 |
| Leopard cat |  |  |  |  |  |  |  |  |  |  |  |  | 1.00 |

**Table S2. Model selection tables for Langtang felid occupancy models. ‘psi’ denotes occupancy, and ‘p’ detection (Models with weights of > 0.05 listed). Predictors for occupancy are: z_alt = altitude, standardised prevalences (% of days taxon recorded) for: z_rm = red muntjac, z_brd = medium sized birds and porcupine, z_bor = wild boar, z_hdn = human activity (images of humans with or without stock or images of domestic stock alone), z_prm = primates, z_ung = ungulates, z_lrg = clouded or common leopard. Predictor for detection (included in all models), eff= camera days.**

1. **Clouded leopard**

**Model selection table**

**psi(Int) p(Int) psi(z_alt) psi(z_brd) psi(z_bor) psi(z_hdn) psi(z_prm) psi(z_rm) psi(z_ung) p(eff) df logLik AICc delta weight**

**129 -2.101 -1.507 0.03130 3 -45.027 96.4 0.00 0.096**

**130 -2.217 -1.547 -0.5849 0.03304 4 -44.029 96.6 0.22 0.087**

**138 -2.353 -1.546 -0.8738 -0.7607 0.03305 5 -43.096 97.0 0.63 0.071**

**194 -2.304 -1.544 -0.6776 0.3929 0.03366 5 -43.314 97.4 1.06 0.057**

**193 -2.155 -1.510 0.3320 0.03181 4 -44.541 97.6 1.24 0.052**

1. **Common leopard**

**psi(Int) p(Int) psi(z_bor) psi(z_hdn) psi(z_prm) psi(z_rm) psi(z_ung) p(eff) df logLik AICc delta weight**

**47 1.4330 -3.597 2.0620 -5.298 8.4170 0.1131 6 -88.274 189.7 0.00 0.361**

**63 2.0080 -3.625 2.1590 -7.201 11.3000 0.90350 0.1123 7 -87.743 191.0 1.34 0.185**

**48 1.4570 -3.598 -0.06703 2.0670 -5.363 8.5370 0.1130 7 -88.271 192.1 2.39 0.109**

**64 9.7710 -3.785 -1.38500 6.3270 -31.490 45.9500 6.28600 0.1111 8 -87.148 192.3 2.61 0.098**

**45 0.5817 -3.515 -2.491 5.3290 0.1124 5 -91.024 192.8 3.16 0.074**

**41 -0.7913 -3.212 0.8341 0.1155 4 -92.377 193.3 3.60 0.060**

1. **Leopard cat**

**psi(Int) p(Int) psi(z_alt) psi(z_hdn) psi(z_lrg)* p(eff) df logLik AICc delta weight**

**15 0.3602 -2.114 1.2300 1.378 0.09644 5 -161.377 333.6 0.00 0.599**

**16 0.3190 -2.115 -0.3021 0.9693 1.355 0.09687 6 -160.927 335.0 1.43 0.292**

**14 0.2392 -2.126 -0.6565 1.422 0.09662 5 -163.326 337.5 3.90 0.085**

***** **This predictor is included only for the leopard cat models – it is a prevalence indicator for the other two (larger) cat species.**
